# Supplementary material for: Metagenomic insights into the rumen microbial fibrolytic enzymes in Indian crossbred cattle fed finger millet straw
Source: PubMed Central journal article supplement (PMC5209320; doi:10.1186/s13568-016-0310-0), 2017-01-03

**Journal Name: AMB Express**

**Title: Metagenomic Insights into the Rumen Microbial Fibrolytic Enzymes in Indian Crossbred Cattle Fed Finger Millet Straw**

**Authors:** V. Lyju Jose<sup>1,2</sup>, Thulasi Appoorthy<sup>1\*</sup>, Ravi P More<sup>3</sup> and A Sha Arun<sup>4</sup>

<sup>1</sup> Rumen Microbiology Laboratory, Animal nutrition Division, National Institute of Animal Nutrition and Physiology, Bangalore, India,

<sup>2</sup> PhD Scholar, Department of Biotechnology, Jain University, Bangalore, India

<sup>3</sup> Bioinformatics Laboratory, Division of Molecular Entomology, National Bureau of Agricultural Insect Resources, Bangalore, India.

<sup>4</sup> Wildlife SOS, Bannerghatta Bear Rescue Centre, Bangalore, India.

**\*Correspondence:**

Dr. Thulasi Appoorthy, thulasi.appoorthy@gmail.com, Ph: 080 25711304, Fax: 080 25711420

Supplementary Table S1. Primers designed for validating contigs encoding lignocellulolytic enzymes from HF cross rumen metagenomic data

| S No | Contig number |    | Length | Tm   | GC% | Sequence                                     | Product size bp |
|------|---------------|----|--------|------|-----|----------------------------------------------|-----------------|
| 1    | contig_3500   | FP | 20     | 59.9 | 55  | GCCAAGGTCAAGAAGACCAG<br>CAACGAGTACCCCAACGTCT | 220             |
|      |               | RP | 20     | 59.9 | 50  | TCGTCGTGCGAATAGATGAG<br>TGCATCGGTGAGGTTGTAGA |                 |
| 2    | contig_320985 | FP | 20     | 60.1 | 50  | CCGTCGTGGAATTCTTCAGT                         | 207             |
|      |               | RP | 20     | 59.9 | 55  | CGACGAACTCCTTCTCCTTG                         |                 |
| 3    | contig_450358 | FP | 20     | 60.1 | 51  | ATGCGGTTCAAGGAAGTGAC                         | 215             |
|      |               | RP | 20     | 60   | 55  | GAGCCCGATATTCTCCACAA<br>ATGCAAGAGGTCATCGGTTC |                 |
| 4    | contig_80122  | FP | 20     | 59.8 | 48  | AGCCTTTCGACTGGCAATTA                         | 250             |
| 5    |               | RP | 20     | 59.9 | 50  | TTGAAATGCATGTCGGTGAT                         |                 |
| 6    | contig_96204  | FP | 20     | 59.2 | 50  | TCAACTTTGCCCCCTGTATC                         | 325             |
|      |               | RP | 20     | 59.9 | 50  | GTGATCCAAAGCAGGGATGT<br>GTGATCCAAAGCAGGGATGT |                 |
| 7    | contig_118682 | FP | 20     | 59.4 | 48  | ATCAGTCCGCAAAAACCATC                         | 564             |
|      |               | RP | 20     | 60   | 50  | AGGAGCTGAAGCTGGACGTA                         |                 |
| 8    | contig_142716 | FP | 20     | 60.9 | 60  | CGCAGAGGTAGGTGACGAAG<br>CGCAGAGGTAGGTGACGAA  | 370             |
|      |               | RP | 20     | 60.7 | 50  | AACATGATCTGGGACCATCG                         |                 |
| 9    | contig_295107 | FP | 20     | 60.8 | 50  | ACTCATTGAAGACGGCATCC                         | 338             |
|      |               | RP | 20     | 59.8 | 50  | GGAGCATAAGGTGCTGAAGG                         |                 |
| 10   | contig_318368 | FP | 20     | 59.8 | 50  | ACGATGTGGAGATCGAAAC                          | 515             |
|      |               | RP | 20     | 60.2 | 50  | CTTTCTTCAGCGCTTTCAGG<br>CCTTCTTCAGCGCTTTCAG  |                 |
| 11   | contig_498267 | FP | 20     | 59.2 | 45  | AAGGGCAAGCATAACCATTG                         | 376             |
|      |               | RP | 20     | 60.1 | 45  | CATCAAAATGTGGAGCGATG                         |                 |
| 12   | contig_62300  | FP | 20     | 59.1 | 50  | CGGAAGTACTGGCCATAAA                          | 564             |
|      |               | RP | 20     | 60.1 | 55  | CACATCACACAGGGTTCGAC                         |                 |
| 13   | contig_403730 | FP | 20     | 60.1 | 50  | CGAATCGTCGTTTCCTTGAG                         | 510             |
|      |               | RP | 20     | 59.9 | 50  | ATATCACACCACTGGCCACA<br>GCGGCAGTCGTCTTCAGTAT |                 |
| 14   | contig_198814 | FP | 20     | 61.1 | 50  | ACCTCCACAAAACCAGTTGC                         | 594             |
|      |               | RP | 20     | 60.8 | 52  | GATATGCACAGGGCGAGATT                         |                 |
| 15   | contig_309249 | FP | 20     | 59.8 | 50  | GTTTACCATGCGGTTACCT                          | 471             |
|      |               | RP | 20     | 60.2 | 55  | GTGGAAGGCTCCACGATCTA                         |                 |
| 16   | contig_384915 | FP | 20     | 59.9 | 55  | GAGGATGAGCAGGTTGAAGC                         | 448             |
|      |               | RP | 20     | 59.7 | 50  | GTGGTATCCCGTTTCCAGA                          |                 |

Supplementary Table S2. Taxonomic distribution of cattle rumen metagenomic data at genus level showing the major genera along with the number of reads assigned to each genera

| <b>Genus Name</b>                                         | <b>Abundance</b> |
|-----------------------------------------------------------|------------------|
| <i>Prevotella</i>                                         | 37757            |
| <i>Bacteroides</i>                                        | 37534            |
| <i>Clostridium</i>                                        | 12149            |
| <i>Ruminococcus</i>                                       | 5124             |
| <i>Parabacteroides</i>                                    | 5092             |
| <i>Eubacterium</i>                                        | 4883             |
| <i>Bacillus</i>                                           | 3615             |
| <i>Fibrobacter</i>                                        | 2905             |
| <i>Butyrivibrio</i>                                       | 2631             |
| <i>Streptococcus</i>                                      | 1879             |
| <i>Alistipes</i>                                          | 1775             |
| <i>Lactobacillus</i>                                      | 1714             |
| <i>Blautia</i>                                            | 1611             |
| unclassified (derived from <i>Erysipelotrichaceae</i> )   | 1462             |
| <i>Roseburia</i>                                          | 1396             |
| <i>Porphyromonas</i>                                      | 1287             |
| <i>Treponema</i>                                          | 1247             |
| unclassified (derived from <i>Peptostreptococcaceae</i> ) | 1136             |
| <i>Paludibacter</i>                                       | 1102             |
| unclassified (derived from <i>Clostridiales</i> )         | 1020             |
| <i>Paenibacillus</i>                                      | 1004             |
| <i>Faecalibacterium</i>                                   | 981              |
| <i>Flavobacterium</i>                                     | 963              |
| <i>Desulfotobacterium</i>                                 | 959              |
| <i>Coprococcus</i>                                        | 950              |
| <i>Victivallis</i>                                        | 910              |
| <i>Caldicellulosiruptor</i>                               | 875              |
| <i>Geobacillus</i>                                        | 873              |
| <i>Bifidobacterium</i>                                    | 799              |
| <i>Fusobacterium</i>                                      | 775              |
| <i>Geobacter</i>                                          | 768              |
| unclassified (derived from <i>Lachnospiraceae</i> )       | 761              |
| <i>Acidaminococcus</i>                                    | 737              |
| <i>Staphylococcus</i>                                     | 727              |
| <i>Capnocytophaga</i>                                     | 724              |
| <i>Pedobacter</i>                                         | 708              |
| <i>Desulfovibrio</i>                                      | 706              |
| <i>Listeria</i>                                           | 701              |
| <i>Spirosoma</i>                                          | 680              |
| <i>Spirochaeta</i>                                        | 678              |
| <i>Chitinophaga</i>                                       | 669              |
| <i>Enterococcus</i>                                       | 613              |
| <i>Thermoanaerobacter</i>                                 | 608              |
| <i>Alkaliphilus</i>                                       | 604              |
| <i>Selenomonas</i>                                        | 594              |
| <i>Chlorobium</i>                                         | 584              |
| <i>Dyadobacter</i>                                        | 580              |

|                                                     |     |
|-----------------------------------------------------|-----|
| unclassified (derived from <i>Bacteria</i> )        | 556 |
| <i>Desulfotomaculum</i>                             | 540 |
| <i>Dorea</i>                                        | 510 |
| <i>Mycoplasma</i>                                   | 509 |
| <i>Holdemania</i>                                   | 508 |
| <i>Vibrio</i>                                       | 504 |
| <i>Methanobrevibacter</i>                           | 495 |
| <i>Coprobacillus</i>                                | 470 |
| <i>Cytophaga</i>                                    | 461 |
| <i>Shewanella</i>                                   | 455 |
| <i>Slackia</i>                                      | 455 |
| <i>Pseudoflavonifractor</i>                         | 452 |
| <i>Pseudomonas</i>                                  | 447 |
| <i>Streptomyces</i>                                 | 443 |
| unclassified (derived from <i>Bacteroidetes</i> )   | 442 |
| <i>Campylobacter</i>                                | 422 |
| <i>Veillonella</i>                                  | 422 |
| <i>Methanosarcina</i>                               | 416 |
| <i>Abiotrophia</i>                                  | 414 |
| <i>Phascolarctobacterium</i>                        | 380 |
| <i>Subdoligranulum</i>                              | 379 |
| <i>Caldanaerobacter</i>                             | 376 |
| <i>Burkholderia</i>                                 | 372 |
| <i>Sphingobacterium</i>                             | 371 |
| <i>Oribacterium</i>                                 | 369 |
| <i>Leeuwenhoekella</i>                              | 358 |
| <i>Synechococcus</i>                                | 356 |
| <i>Zunongwangia</i>                                 | 348 |
| <i>Acetivibrio</i>                                  | 346 |
| unclassified (derived from <i>Ruminococcaceae</i> ) | 338 |
| <i>Polaribacter</i>                                 | 330 |
| <i>Catenibacterium</i>                              | 324 |
| <i>Acholeplasma</i>                                 | 315 |
| <i>Cellulosilyticum</i>                             | 305 |
| <i>Anaerotruncus</i>                                | 304 |
| unclassified (derived from unclassified sequences)  | 298 |
| <i>Carboxydotherrmus</i>                            | 296 |
| <i>Escherichia</i>                                  | 293 |
| <i>Thermotoga</i>                                   | 293 |
| <i>Brachyspira</i>                                  | 287 |
| <i>Candidatus Solibacter</i>                        | 281 |
| <i>Maribacter</i>                                   | 276 |
| <i>Ethanoligenens</i>                               | 275 |
| <i>Gramella</i>                                     | 269 |
| <i>Pelobacter</i>                                   | 268 |
| <i>Mucilaginibacter</i>                             | 255 |
| <i>Dictyoglomus</i>                                 | 253 |
| <i>Helicobacter</i>                                 | 253 |
| <i>Magnetospirillum</i>                             | 249 |
| <i>Leptotrichia</i>                                 | 245 |

|                                                      |     |
|------------------------------------------------------|-----|
| <i>Eggerthella</i>                                   | 242 |
| <i>Mitsuokella</i>                                   | 240 |
| <i>Pelodictyon</i>                                   | 238 |
| <i>Anaeromyxobacter</i>                              | 237 |
| <i>Thermoanaerobacterium</i>                         | 236 |
| <i>Anaerostipes</i>                                  | 235 |
| <i>Opitutus</i>                                      | 228 |
| <i>Turicibacter</i>                                  | 226 |
| <i>Microscilla</i>                                   | 224 |
| <i>Atopobium</i>                                     | 223 |
| <i>Corynebacterium</i>                               | 220 |
| <i>Mycobacterium</i>                                 | 220 |
| <i>Neisseria</i>                                     | 220 |
| <i>Anoxybacillus</i>                                 | 219 |
| <i>Haemophilus</i>                                   | 216 |
| <i>Marivirga</i>                                     | 213 |
| <i>Lactococcus</i>                                   | 212 |
| <i>Dokdonia</i>                                      | 210 |
| <i>Shuttleworthia</i>                                | 210 |
| unclassified (derived from <i>Flavobacteriales</i> ) | 210 |
| <i>Oceanobacillus</i>                                | 209 |
| <i>Xanthomonas</i>                                   | 208 |
| <i>Halothermothrix</i>                               | 207 |
| <i>Leptospira</i>                                    | 207 |
| <i>Borrelia</i>                                      | 199 |
| <i>Moorella</i>                                      | 197 |
| <i>Actinobacillus</i>                                | 191 |
| <i>Collinsella</i>                                   | 191 |
| <i>Leadbetterella</i>                                | 191 |
| <i>Desulfuromonas</i>                                | 189 |
| <i>Propionibacterium</i>                             | 188 |
| <i>Syntrophomonas</i>                                | 188 |
| <i>Chlorobaculum</i>                                 | 186 |
| <i>Trichomonas</i>                                   | 186 |
| <i>Anaerococcus</i>                                  | 185 |
| <i>Elusimicrobium</i>                                | 185 |
| <i>Rhodopirellula</i>                                | 183 |
| <i>Exiguobacterium</i>                               | 182 |
| <i>Thermincola</i>                                   | 181 |
| <i>Akkermansia</i>                                   | 179 |
| <i>Syntrophobacter</i>                               | 178 |
| <i>Cyanothece</i>                                    | 177 |
| <i>Peptoniphilus</i>                                 | 177 |
| <i>Planctomyces</i>                                  | 173 |
| <i>Francisella</i>                                   | 165 |
| <i>Yersinia</i>                                      | 163 |
| <i>Kordia</i>                                        | 159 |
| <i>Rhizobium</i>                                     | 159 |
| unclassified (derived from <i>Flavobacteriia</i> )   | 159 |
| <i>Lentisphaera</i>                                  | 158 |

|                                                   |     |
|---------------------------------------------------|-----|
| <i>Alicyclobacillus</i>                           | 156 |
| <i>Deinococcus</i>                                | 155 |
| <i>Dialister</i>                                  | 155 |
| <i>Brevibacillus</i>                              | 153 |
| <i>Rickettsia</i>                                 | 152 |
| <i>Algoriphagus</i>                               | 151 |
| <i>Lysinibacillus</i>                             | 151 |
| <i>Finegoldia</i>                                 | 148 |
| <i>Rhodopseudomonas</i>                           | 148 |
| <i>Ilyobacter</i>                                 | 147 |
| <i>Acinetobacter</i>                              | 146 |
| <i>Thermosinus</i>                                | 145 |
| <i>Robiginitalea</i>                              | 144 |
| <i>Desulfococcus</i>                              | 142 |
| <i>Halanaerobium</i>                              | 141 |
| <i>Rhodospirillum</i>                             | 140 |
| <i>Rhodothermus</i>                               | 140 |
| <i>Prochlorococcus</i>                            | 139 |
| <i>Solobacterium</i>                              | 138 |
| <i>Bradyrhizobium</i>                             | 137 |
| <i>Pelotomaculum</i>                              | 137 |
| <i>Symbiobacterium</i>                            | 137 |
| <i>Methanococcus</i>                              | 136 |
| <i>Thermosipho</i>                                | 136 |
| <i>Anaerofustis</i>                               | 135 |
| <i>Methylobacterium</i>                           | 134 |
| <i>Pyramidobacter</i>                             | 133 |
| unclassified (derived from <i>Siphoviridae</i> )  | 133 |
| <i>Desulfatibacillum</i>                          | 131 |
| <i>Croceibacter</i>                               | 126 |
| <i>Candidatus Koribacter</i>                      | 125 |
| <i>Dehalococcoides</i>                            | 125 |
| <i>Leuconostoc</i>                                | 125 |
| <i>Acidovorax</i>                                 | 123 |
| <i>Diplosphaera</i>                               | 123 |
| <i>Sorangium</i>                                  | 123 |
| <i>Chryseobacterium</i>                           | 122 |
| <i>Desulfotalea</i>                               | 122 |
| <i>Pedosphaera</i>                                | 122 |
| <i>Bulleidia</i>                                  | 121 |
| <i>Chloroflexus</i>                               | 120 |
| unclassified (derived from <i>Elusimicrobia</i> ) | 119 |
| <i>Olsenella</i>                                  | 118 |
| <i>Thermosediminibacter</i>                       | 118 |
| <i>Chloroherpeton</i>                             | 116 |
| <i>Peptostreptococcus</i>                         | 116 |
| <i>Chthoniobacter</i>                             | 114 |
| <i>Fervidobacterium</i>                           | 114 |
| <i>Pseudoalteromonas</i>                          | 114 |
| <i>Psychroflexus</i>                              | 114 |

|                                                         |     |
|---------------------------------------------------------|-----|
| <i>Aeromonas</i>                                        | 113 |
| <i>Erysipelothrix</i>                                   | 111 |
| <i>Nostoc</i>                                           | 111 |
| <i>Salmonella</i>                                       | 111 |
| unclassified (derived from <i>Deltaproteobacteria</i> ) | 111 |
| <i>Cryptobacterium</i>                                  | 110 |
| <i>Enterobacter</i>                                     | 110 |
| <i>Photobacterium</i>                                   | 110 |
| <i>Sebaldella</i>                                       | 109 |
| <i>Roseiflexus</i>                                      | 105 |
| <i>Verrucomicrobium</i>                                 | 105 |
| <i>Candidatus Phytoplasma</i>                           | 104 |
| <i>Desulfobacterium</i>                                 | 104 |
| <i>Myxococcus</i>                                       | 104 |
| <i>Caulobacter</i>                                      | 103 |
| <i>Megasphaera</i>                                      | 103 |
| <i>Dethiosulfovibrio</i>                                | 102 |
| <i>Methanothermobacter</i>                              | 102 |
| <i>Petrogga</i>                                         | 102 |
| <i>Methanocaldococcus</i>                               | 101 |
| <i>Saccharophagus</i>                                   | 101 |
| <i>Syntrophus</i>                                       | 101 |
| <i>Heliobacterium</i>                                   | 100 |
| <i>Sulfurihydrogenibium</i>                             | 100 |

Supplementary Table S3. List showing the names and abundance of enzymes identified in cattle rumen metadata using KEGG database

| EC number | Enzyme Name                                                                                                                                                                                                                           | Abundance |
|-----------|---------------------------------------------------------------------------------------------------------------------------------------------------------------------------------------------------------------------------------------|-----------|
| 3.6.4.12  | DNA helicase                                                                                                                                                                                                                          | 589       |
| 2.7.7.7   | DNA-directed DNA polymerase                                                                                                                                                                                                           | 553       |
| 2.7.7.6   | DNA-directed RNA polymerase                                                                                                                                                                                                           | 371       |
| 3.2.1.21  | beta-glucosidase                                                                                                                                                                                                                      | 358       |
| 3.6.3.14  | H <sup>+</sup> -transporting two-sector ATPase                                                                                                                                                                                        | 311       |
| 3.2.1.23  | beta-galactosidase                                                                                                                                                                                                                    | 235       |
| 6.3.5.5   | Carbamoyl-phosphate synthase (glutamine-hydrolysing)                                                                                                                                                                                  | 168       |
| 2.7.6.5   | GTP diphosphokinase                                                                                                                                                                                                                   | 162       |
| 2.1.1.37  | DNA (cytosine-5-)-methyltransferase                                                                                                                                                                                                   | 155       |
| 1.17.4.2  | ribonucleoside-triphosphate reductase                                                                                                                                                                                                 | 155       |
| 2.2.1.1   | transketolase                                                                                                                                                                                                                         | 150       |
| 6.1.1.20  | Phenylalanine-tRNA ligase                                                                                                                                                                                                             | 142       |
| 6.2.1.3   | long-chain-fatty-acid-CoA ligase                                                                                                                                                                                                      | 142       |
| 1.6.5.3   | NADH:ubiquinone reductase (H <sup>+</sup> -translocating)                                                                                                                                                                             | 141       |
| 2.4.1.1   | glycogen phosphorylase                                                                                                                                                                                                                | 137       |
| 6.5.1.2   | DNA ligase (NAD <sup>+</sup> )                                                                                                                                                                                                        | 134       |
| 6.1.1.5   | Isoleucine-tRNA ligase                                                                                                                                                                                                                | 130       |
| 5.4.2.1   | phosphoglycerate mutase --> transferred. Now recognized as two separate enzymes EC 5.4.2.11, phosphoglycerate mutase (2,3-diphosphoglycerate-dependent) and EC 5.4.2.12, phosphoglycerate mutase (2,3-diphosphoglycerate-independent) | 118       |
| 6.3.1.2   | Glutamate-ammonia ligase                                                                                                                                                                                                              | 117       |
| 6.1.1.10  | Methionine-tRNA ligase                                                                                                                                                                                                                | 112       |
| 3.4.21.53 | Endopeptidase La                                                                                                                                                                                                                      | 105       |
| 2.7.1.48  | uridine kinase                                                                                                                                                                                                                        | 105       |
| 5.4.2.8   | phosphomannomutase                                                                                                                                                                                                                    | 103       |
| 6.1.1.7   | Alanine-tRNA ligase                                                                                                                                                                                                                   | 103       |
| 1.1.1.100 | 3-oxoacyl-[acyl-carrier-protein] reductase                                                                                                                                                                                            | 95        |
| 3.2.1.22  | alpha-galactosidase                                                                                                                                                                                                                   | 94        |
| 6.1.1.3   | Threonine-tRNA ligase                                                                                                                                                                                                                 | 93        |
| 6.1.1.12  | Aspartate-tRNA ligase                                                                                                                                                                                                                 | 89        |
| 6.1.1.4   | Leucine-tRNA ligase                                                                                                                                                                                                                   | 89        |
| 2.5.1.49  | O-acetylhomoserine aminocarboxypropyltransferase                                                                                                                                                                                      | 89        |
| 3.6.1.1   | inorganic diphosphatase                                                                                                                                                                                                               | 88        |
| 2.1.1.13  | methionine synthase                                                                                                                                                                                                                   | 86        |
| 3.1.26.4  | ribonuclease H                                                                                                                                                                                                                        | 86        |
| 6.1.1.9   | Valine-tRNA ligase                                                                                                                                                                                                                    | 86        |
| 3.2.1.52  | beta-N-acetylhexosaminidase                                                                                                                                                                                                           | 86        |
| 5.1.3.2   | UDP-glucose 4-epimerase                                                                                                                                                                                                               | 85        |
| 6.1.1.6   | Lysine-tRNA ligase                                                                                                                                                                                                                    | 82        |
| 6.1.1.19  | Arginine-tRNA ligase                                                                                                                                                                                                                  | 82        |
| 2.5.1.75  | tRNA dimethylallyltransferase                                                                                                                                                                                                         | 82        |
| 6.1.1.17  | Glutamate-tRNA ligase                                                                                                                                                                                                                 | 81        |
| 6.3.5.3   | phosphoribosylformylglycinamide synthase                                                                                                                                                                                              | 80        |
| 6.1.1.21  | Histidine-tRNA ligase                                                                                                                                                                                                                 | 80        |
| 2.7.7.13  | mannose-1-phosphate guanylyltransferase                                                                                                                                                                                               | 79        |



|           |                                                                                 |    |
|-----------|---------------------------------------------------------------------------------|----|
| 2.4.2.14  | amidophosphoribosyltransferase                                                  | 79 |
| 2.7.1.11  | 6-phosphofructokinase                                                           | 78 |
| 2.4.1.25  | 4-alpha-glucanotransferase                                                      | 78 |
| 2.7.7.24  | glucose-1-phosphate thymidyltransferase                                         | 77 |
| 6.2.1.30  | phenylacetate-CoA ligase                                                        | 76 |
| 2.4.1.18  | 1,4-alpha-glucan branching enzyme                                               | 76 |
| 1.2.7.3   | 2-oxoglutarate synthase                                                         | 75 |
| 3.4.14.5  | dipeptidyl-peptidase IV                                                         | 75 |
| 6.1.1.2   | Tryptophan-tRNA ligase                                                          | 75 |
| 2.7.13.3  | histidine kinase                                                                | 73 |
| 1.1.1.22  | UDP-glucose 6-dehydrogenase                                                     | 73 |
| 6.3.2.13  | UDP-N-acetylmuramoyl-L-alanyl-D-glutamate-2,6-diaminopimelate ligase            | 73 |
| 6.1.1.15  | Proline-tRNA ligase                                                             | 72 |
| 3.2.1.51  | alpha-L-fucosidase                                                              | 72 |
| 2.7.7.8   | polyribonucleotide nucleotidyltransferase                                       | 72 |
| 6.1.1.11  | Serine-tRNA ligase                                                              | 71 |
| 2.7.1.2   | glucokinase                                                                     | 70 |
| 4.2.1.20  | tryptophan synthase                                                             | 70 |
| 6.3.2.10  | UDP-N-acetylmuramoyl-tripeptide-D-alanyl-D-alanine ligase                       | 69 |
| 2.4.1.21  | starch synthase (glycosyl-transferring)                                         | 67 |
| 2.3.1.54  | formate C-acetyltransferase                                                     | 67 |
| 1.17.7.1  | (E)-4-hydroxy-3-methylbut-2-enyl-diphosphate synthase                           | 67 |
| 6.3.4.4   | Adenylosuccinate synthase                                                       | 67 |
| 2.7.4.16  | thiamine-phosphate kinase                                                       | 66 |
| 6.3.5.4   | Asparagine synthase (glutamine-hydrolysing)                                     | 66 |
| 2.8.1.7   | cysteine desulfurase                                                            | 65 |
| 2.6.1.1   | aspartate transaminase                                                          | 65 |
| 5.1.3.14  | UDP-N-acetylglucosamine 2-epimerase (non-hydrolysing)                           | 65 |
| 2.7.6.1   | ribose-phosphate diphosphokinase                                                | 64 |
| 3.2.1.55  | non-reducing end alpha-L-arabinofuranosidase                                    | 64 |
| 2.7.1.6   | galactokinase                                                                   | 63 |
| 4.2.3.1   | threonine synthase                                                              | 63 |
| 2.3.1.179 | beta-ketoacyl-[acyl-carrier-protein] synthase II                                | 63 |
| 5.3.1.9   | Glucose-6-phosphate isomerase                                                   | 62 |
| 4.2.99.18 | DNA-(apurinic or apyrimidinic site) lyase                                       | 62 |
| 2.2.1.6   | acetolactate synthase                                                           | 62 |
| 6.2.1.1   | acetate-CoA ligase                                                              | 62 |
| 4.1.1.20  | Diaminopimelate decarboxylase                                                   | 62 |
| 6.3.2.4   | D-Alanine-D-alanine ligase                                                      | 61 |
| 2.3.1.30  | serine O-acetyltransferase                                                      | 61 |
| 2.7.2.1   | acetate kinase                                                                  | 61 |
| 1.1.1.95  | phosphoglycerate dehydrogenase                                                  | 60 |
| 1.8.1.9   | thioredoxin-disulfide reductase                                                 | 60 |
| 2.4.1.227 | undecaprenyldiphospho-muramoylpentapeptide beta-N-acetylglucosaminyltransferase | 60 |
| 2.5.1.47  | cysteine synthase                                                               | 60 |
| 1.4.4.2   | glycine dehydrogenase (decarboxylating)                                         | 60 |
| 2.4.2.9   | uracil phosphoribosyltransferase                                                | 60 |
| 6.3.4.3   | formate-tetrahydrofolate ligase                                                 | 60 |
| 4.4.1.8   | cystathionine beta-lyase                                                        | 59 |
| 4.3.3.7   | 4-hydroxy-tetrahydrodipicolinate synthase                                       | 59 |

|           |                                                                                            |    |
|-----------|--------------------------------------------------------------------------------------------|----|
| 6.3.2.8   | UDP-N-acetylmuramate-L-alanine ligase                                                      | 58 |
| 1.1.1.205 | IMP dehydrogenase                                                                          | 58 |
| 6.1.1.14  | glycine-tRNA ligase                                                                        | 58 |
| 2.5.1.6   | methionine adenosyltransferase                                                             | 58 |
| 4.3.2.1   | argininosuccinate lyase                                                                    | 57 |
| 3.4.16.4  | serine-type D-Ala-D-Ala carboxypeptidase                                                   | 57 |
| 3.1.11.5  | exodeoxyribonuclease V                                                                     | 57 |
| 5.1.3.13  | dTDP-4-dehydrorhamnose 3,5-epimerase                                                       | 57 |
| 2.7.9.1   | pyruvate, phosphate dikinase                                                               | 57 |
| 2.5.1.7   | UDP-N-acetylglucosamine 1-carboxyvinyltransferase                                          | 57 |
| 2.7.2.4   | aspartate kinase                                                                           | 56 |
| 2.6.1.9   | histidinol-phosphate transaminase                                                          | 56 |
| 2.4.2.1   | purine-nucleoside phosphorylase                                                            | 56 |
| 4.1.1.3   | Oxaloacetate decarboxylase                                                                 | 55 |
| 3.4.21.92 | Endopeptidase Clp                                                                          | 55 |
| 6.1.1.1   | Tyrosine-tRNA ligase                                                                       | 54 |
| 1.1.1.267 | 1-deoxy-D-xylulose-5-phosphate reductoisomerase                                            | 54 |
| 1.3.99.22 | coproporphyrinogen dehydrogenase                                                           | 54 |
| 6.3.2.9   | UDP-N-acetylmuramoyl-L-alanine-D-glutamate ligase                                          | 53 |
| 3.2.1.20  | alpha-glucosidase                                                                          | 53 |
| 6.3.5.2   | GMP synthase (glutamine-hydrolysing)                                                       | 53 |
| 1.2.1.41  | glutamate-5-semialdehyde dehydrogenase                                                     | 53 |
| 2.1.2.9   | methionyl-tRNA formyltransferase                                                           | 53 |
| 3.5.99.6  | glucosamine-6-phosphate deaminase                                                          | 53 |
| 4.3.2.2   | adenylosuccinate lyase                                                                     | 53 |
| 4.2.1.46  | dTDP-glucose 4,6-dehydratase                                                               | 52 |
| 4.2.3.5   | chorismate synthase                                                                        | 52 |
| 2.4.1.129 | peptidoglycan glycosyltransferase                                                          | 51 |
| 3.5.2.3   | dihydroorotase                                                                             | 51 |
| 5.1.3.1   | ribulose-phosphate 3-epimerase                                                             | 51 |
| 2.6.1.16  | glutamine-fructose-6-phosphate transaminase (isomerizing)                                  | 51 |
| 1.3.99.1  | succinate dehydrogenase                                                                    | 51 |
| 3.4.21.89 | Signal peptidase I                                                                         | 51 |
| 6.1.1.16  | Cysteine-tRNA ligase                                                                       | 51 |
| 5.1.3.3   | Aldose 1-epimerase                                                                         | 50 |
| 1.2.1.11  | aspartate-semialdehyde dehydrogenase                                                       | 50 |
| 2.5.1.31  | ditrans, polycis-undecaprenyl-diphosphate synthase [(2E,6E)-farnesyl-diphosphate specific] | 50 |
| 3.6.4.13  | RNA helicase                                                                               | 50 |
| 4.2.1.2   | fumarate hydratase                                                                         | 49 |
| 2.7.7.27  | glucose-1-phosphate adenylyltransferase                                                    | 49 |
| 2.3.1.180 | beta-ketoacyl-[acyl-carrier-protein] synthase III                                          | 49 |
| 2.3.1.15  | glycerol-3-phosphate 1-O-acyltransferase                                                   | 49 |
| 3.1.5.1   | dGTPase                                                                                    | 49 |
| 1.1.1.158 | UDP-N-acetylmuramate dehydrogenase --> transferred, now EC 1.3.1.98                        | 49 |
| 6.3.4.2   | CTP synthase (glutamine hydrolysing)                                                       | 48 |
| 2.7.8.13  | phospho-N-acetylmuramoyl-pentapeptide-transferase                                          | 48 |
| 6.1.1.18  | Glutamine-tRNA ligase                                                                      | 48 |
| 4.1.2.13  | fructose-bisphosphate aldolase                                                             | 48 |
| 2.1.1.45  | thymidylate synthase                                                                       | 48 |
| 4.1.3.27  | anthranilate synthase                                                                      | 47 |

|           |                                                                |    |
|-----------|----------------------------------------------------------------|----|
| 4.2.3.4   | 3-dehydroquinate synthase                                      | 47 |
| 3.1.11.6  | exodeoxyribonuclease VII                                       | 47 |
| 1.1.1.94  | glycerol-3-phosphate dehydrogenase [NAD(P)+]                   | 47 |
| 2.1.2.2   | phosphoribosylglycinamide formyltransferase                    | 46 |
| 3.6.1.23  | dUTP diphosphatase                                             | 46 |
| 2.7.4.8   | guanylate kinase                                               | 46 |
| 2.6.1.83  | LL-diaminopimelate aminotransferase                            | 46 |
| 2.7.2.3   | phosphoglycerate kinase                                        | 46 |
| 6.3.5.1   | NAD+ synthase (glutamine-hydrolysing)                          | 45 |
| 1.3.98.1  | dihydroorotate dehydrogenase (fumarate)                        | 45 |
| 3.1.3.5   | 5'-nucleotidase                                                | 44 |
| 1.1.1.23  | histidinol dehydrogenase                                       | 44 |
| 2.7.1.4   | fructokinase                                                   | 44 |
| 2.3.1.41  | beta-ketoacyl-[acyl-carrier-protein] synthase I                | 43 |
| 1.4.1.4   | glutamate dehydrogenase (NADP+)                                | 43 |
| 1.3.1.26  | dihydrodipicolinate reductase --> transferred, now EC 1.17.1.8 | 42 |
| 2.3.1.47  | 8-amino-7-oxononanoate synthase                                | 42 |
| 6.3.4.13  | phosphoribosylamine-glycine ligase                             | 42 |
| 5.1.1.7   | diaminopimelate epimerase                                      | 42 |
| 4.1.2.4   | deoxyribose-phosphate aldolase                                 | 42 |
| 2.3.1.39  | [acyl-carrier-protein] S-malonyltransferase                    | 41 |
| 4.2.1.59  | 3-hydroxyacyl-[acyl-carrier-protein] dehydratase               | 41 |
| 2.7.4.3   | adenylate kinase                                               | 41 |
| 2.7.1.17  | xylulokinase                                                   | 41 |
| 5.3.1.6   | Ribose-5-phosphate isomerase                                   | 41 |
| 2.1.1.72  | site-specific DNA-methyltransferase (adenine-specific)         | 40 |
| 2.1.2.1   | glycine hydroxymethyltransferase                               | 40 |
| 2.7.4.22  | UMP kinase                                                     | 40 |
| 1.8.1.4   | dihydrolipoyl dehydrogenase                                    | 39 |
| 2.7.2.11  | glutamate 5-kinase                                             | 39 |
| 6.4.1.1   | pyruvate carboxylase                                           | 39 |
| 2.5.1.19  | 3-phosphoshikimate 1-carboxyvinyltransferase                   | 39 |
| 4.2.1.11  | phosphopyruvate hydratase                                      | 38 |
| 2.7.1.69  | protein-Npi-phosphohistidine-sugar phosphotransferase          | 38 |
| 2.3.1.191 | UDP-3-O-(3-hydroxymyristoyl)glucosamine N-acyltransferase      | 38 |
| 4.2.1.9   | dihydroxy-acid dehydratase                                     | 37 |
| 1.1.1.25  | shikimate dehydrogenase                                        | 37 |
| 1.1.5.3   | glycerol-3-phosphate dehydrogenase                             | 37 |
| 1.1.1.133 | dTDP-4-dehydrorhamnose reductase                               | 37 |
| 2.4.1.182 | lipid-A-disaccharide synthase                                  | 37 |
| 5.3.1.1   | Triose-phosphate isomerase                                     | 36 |
| 2.3.1.46  | homoserine O-succinyltransferase                               | 36 |
| 5.3.1.8   | Mannose-6-phosphate isomerase                                  | 36 |
| 4.2.1.47  | GDP-mannose 4,6-dehydratase                                    | 36 |
| 2.7.7.3   | pantetheine-phosphate adenylyltransferase                      | 36 |
| 2.7.2.8   | acetylglutamate kinase                                         | 36 |
| 3.2.1.25  | beta-mannosidase                                               | 36 |
| 3.5.4.12  | dCMP deaminase                                                 | 35 |
| 1.11.1.9  | glutathione peroxidase                                         | 35 |
| 1.2.1.12  | glyceraldehyde-3-phosphate dehydrogenase (phosphorylating)     | 35 |

|           |                                                                       |    |
|-----------|-----------------------------------------------------------------------|----|
| 6.3.1.1   | Aspartate-ammonia ligase                                              | 35 |
| 2.7.7.60  | 2-C-methyl-D-erythritol 4-phosphate cytidyltransferase                | 35 |
| 1.17.1.2  | 4-hydroxy-3-methylbut-2-enyl diphosphate reductase                    | 35 |
| 3.1.3.11  | fructose-bisphosphatase                                               | 35 |
| 3.2.1.4   | cellulase                                                             | 35 |
| 2.1.3.2   | aspartate carbamoyltransferase                                        | 35 |
| 4.2.1.10  | 3-dehydroquinate dehydratase                                          | 34 |
| 2.3.3.13  | 2-isopropylmalate synthase                                            | 34 |
| 2.7.1.30  | glycerol kinase                                                       | 34 |
| 3.6.1.27  | undecaprenyl-diphosphate phosphatase                                  | 34 |
| 2.7.1.148 | 4-(cytidine 5'-diphospho)-2-C-methyl-D-erythritol kinase              | 34 |
| 2.7.4.14  | UMP/CMP kinase                                                        | 33 |
| 2.5.1.90  | all-trans-octaprenyl-diphosphate synthase                             | 33 |
| 1.17.4.1  | ribonucleoside-diphosphate reductase                                  | 33 |
| 3.1.4.16  | 2',3'-cyclic-nucleotide 2'-phosphodiesterase                          | 33 |
| 2.7.8.8   | CDP-diacylglycerol-serine O-phosphatidyltransferase                   | 33 |
| 2.5.1.55  | 3-deoxy-8-phosphooctulonate synthase                                  | 33 |
| 1.1.1.85  | 3-isopropylmalate dehydrogenase                                       | 32 |
| 1.5.1.2   | pyrroline-5-carboxylate reductase                                     | 32 |
| 2.5.1.56  | N-acetylneuraminase synthase                                          | 32 |
| 3.3.1.1   | adenosylhomocysteinase                                                | 32 |
| 2.3.1.8   | phosphate acetyltransferase                                           | 32 |
| 2.7.1.23  | NAD <sup>+</sup> kinase                                               | 32 |
| 2.7.8.5   | CDP-diacylglycerol-glycerol-3-phosphate 3-phosphatidyltransferase     | 32 |
| 3.1.26.11 | tRNase Z                                                              | 32 |
| 1.2.1.38  | N-acetyl-gamma-glutamyl-phosphate reductase                           | 32 |
| 2.4.2.11  | nicotinate phosphoribosyltransferase --> transferred. Now EC 6.3.4.21 | 32 |
| 6.3.1.5   | NAD <sup>+</sup> synthase                                             | 32 |
| 3.5.1.108 | UDP-3-O-acyl-N-acetylglucosamine deacetylase                          | 32 |
| 5.4.99.18 | 5-(carboxyamino)imidazole ribonucleotide mutase                       | 31 |
| 6.3.3.1   | phosphoribosylformylglycinamide cyclo-ligase                          | 31 |
| 2.4.2.2   | pyrimidine-nucleoside phosphorylase                                   | 31 |
| 3.2.1.1   | alpha-amylase                                                         | 31 |
| 2.7.7.41  | phosphatidate cytidyltransferase                                      | 31 |
| 3.5.4.2   | adenine deaminase                                                     | 31 |
| 4.2.1.7   | altronate dehydratase                                                 | 31 |
| 2.6.1.42  | branched-chain-amino-acid transaminase                                | 31 |
| 1.5.1.20  | methylenetetrahydrofolate reductase [NAD(P)H]                         | 31 |
| 2.4.2.8   | hypoxanthine phosphoribosyltransferase                                | 31 |
| 5.3.1.12  | Glucuronate isomerase                                                 | 30 |
| 4.1.99.12 | 3,4-dihydroxy-2-butanone-4-phosphate synthase                         | 30 |
| 1.1.1.262 | 4-hydroxythreonine-4-phosphate dehydrogenase                          | 30 |
| 3.5.4.3   | guanine deaminase                                                     | 30 |
| 6.1.1.22  | Asparagine-tRNA ligase                                                | 30 |
| 2.4.2.10  | orotate phosphoribosyltransferase                                     | 30 |
| 2.7.1.40  | pyruvate kinase                                                       | 30 |
| 3.2.1.31  | beta-glucuronidase                                                    | 29 |
| 4.1.1.23  | Orotidine-5'-phosphate decarboxylase                                  | 29 |
| 3.5.1.1   | asparaginase                                                          | 29 |
| 5.4.99.5  | Chorismate mutase                                                     | 29 |

|           |                                                                                                   |    |
|-----------|---------------------------------------------------------------------------------------------------|----|
| 3.6.1.19  | nucleoside-triphosphate diphosphatase                                                             | 29 |
| 1.4.3.16  | L-aspartate oxidase                                                                               | 29 |
| 3.5.4.5   | cytidine deaminase                                                                                | 29 |
| 3.6.3.34  | iron-chelate-transporting ATPase                                                                  | 29 |
| 3.2.2.9   | adenosylhomocysteine nucleosidase                                                                 | 29 |
| 2.4.1.83  | dolichyl-phosphate beta-D-mannosyltransferase                                                     | 28 |
| 2.7.1.45  | 2-dehydro-3-deoxygluconokinase                                                                    | 28 |
| 2.7.1.21  | thymidine kinase                                                                                  | 28 |
| 2.5.1.15  | dihydropteroate synthase                                                                          | 28 |
| 4.2.2.2   | pectate lyase                                                                                     | 28 |
| 4.6.1.12  | 2-C-methyl-D-erythritol 2,4-cyclodiphosphate synthase                                             | 28 |
| 5.4.99.2  | Methylmalonyl-CoA mutase                                                                          | 28 |
| 3.1.21.2  | deoxyribonuclease IV (phage-T4-induced)                                                           | 28 |
| 3.6.3.17  | monosaccharide-transporting ATPase                                                                | 28 |
| 3.2.2.27  | uracil-DNA glycosylase                                                                            | 28 |
| 2.3.1.182 | (R)-citramalate synthase                                                                          | 28 |
| 2.7.2.7   | butyrate kinase                                                                                   | 27 |
| 2.4.2.7   | adenine phosphoribosyltransferase                                                                 | 27 |
| 2.6.1.52  | phosphoserine transaminase                                                                        | 27 |
| 2.5.1.72  | quinolinate synthase                                                                              | 27 |
| 3.1.3.1   | alkaline phosphatase                                                                              | 27 |
| 4.1.1.65  | phosphatidylserine decarboxylase                                                                  | 27 |
| 1.1.1.38  | malate dehydrogenase (oxaloacetate-decarboxylating)                                               | 27 |
| 4.1.2.5   | L-threonine aldolase                                                                              | 27 |
| 3.1.22.4  | crossover junction endodeoxyribonuclease                                                          | 26 |
| 1.1.1.57  | fructuronate reductase                                                                            | 26 |
| 6.3.4.15  | Biotin-[acetyl-CoA-carboxylase] ligase                                                            | 26 |
| 3.1.3.18  | phosphoglycolate phosphatase                                                                      | 26 |
| 6.3.2.6   | phosphoribosylaminoimidazolesuccinocarboxamide synthase                                           | 26 |
| 2.7.1.90  | diphosphate-fructose-6-phosphate 1-phosphotransferase                                             | 25 |
| 3.1.11.2  | exodeoxyribonuclease III                                                                          | 25 |
| 2.7.1.5   | rhamnulokinase                                                                                    | 25 |
| 3.6.3.31  | polyamine-transporting ATPase                                                                     | 24 |
| 1.4.1.16  | diaminopimelate dehydrogenase                                                                     | 24 |
| 2.7.1.31  | glycerate 3-kinase                                                                                | 24 |
| 6.3.3.2   | 5-Formyltetrahydrofolate cyclo-ligase                                                             | 24 |
| 1.1.1.3   | homoserine dehydrogenase                                                                          | 24 |
| 2.1.2.10  | aminomethyltransferase                                                                            | 24 |
| 4.2.1.75  | uroporphyrinogen-III synthase                                                                     | 24 |
| 2.4.2.3   | uridine phosphorylase                                                                             | 24 |
| 1.1.1.271 | GDP-L-fucose synthase                                                                             | 23 |
| 4.3.1.3   | histidine ammonia-lyase                                                                           | 23 |
| 6.3.4.5   | Argininosuccinate synthase                                                                        | 23 |
| 2.8.1.6   | biotin synthase                                                                                   | 23 |
| 4.3.1.17  | L-Serine ammonia-lyase                                                                            | 23 |
| 2.5.1.54  | 3-deoxy-7-phosphoheptulonate synthase                                                             | 23 |
| 2.7.1.130 | tetraacyldisaccharide 4'-kinase                                                                   | 23 |
| 2.1.2.11  | 3-methyl-2-oxobutanoate hydroxymethyltransferase                                                  | 23 |
| 5.3.1.16  | 1-(5-phosphoribosyl)-5-[(5-phosphoribosylamino)methylideneamino]imidazole-4-carboxamide isomerase | 23 |

|           |                                                                    |    |
|-----------|--------------------------------------------------------------------|----|
| 3.4.11.2  | membrane alanyl aminopeptidase                                     | 23 |
| 4.1.2.9   | phosphoketolase                                                    | 23 |
| 4.6.1.1   | adenylate cyclase                                                  | 22 |
| 2.4.2.22  | xanthine phosphoribosyltransferase                                 | 22 |
| 2.7.1.33  | pantothenate kinase                                                | 22 |
| 3.4.23.36 | Signal peptidase II                                                | 22 |
| 2.7.7.9   | UTP-glucose-1-phosphate uridylyltransferase                        | 22 |
| 2.7.4.1   | polyphosphate kinase                                               | 22 |
| 2.5.1.78  | 6,7-dimethyl-8-ribityllumazine synthase                            | 22 |
| 2.4.1.20  | cellobiose phosphorylase                                           | 22 |
| 4.1.1.49  | phosphoenolpyruvate carboxykinase (ATP)                            | 22 |
| 5.4.2.2   | phosphoglucosmutase (alpha-D-glucose-1,6-bisphosphate-dependent)   | 22 |
| 6.4.1.3   | propionyl-CoA carboxylase                                          | 21 |
| 2.7.7.38  | 3-deoxy-manno-octulosonate cytidylyltransferase                    | 21 |
| 1.1.1.58  | tagaturonate reductase                                             | 21 |
| 1.1.1.290 | 4-phosphoerythronate dehydrogenase                                 | 21 |
| 3.5.1.16  | acetylornithine deacetylase                                        | 21 |
| 2.3.1.51  | 1-acylglycerol-3-phosphate O-acyltransferase                       | 21 |
| 5.3.1.14  | L-Rhamnose isomerase                                               | 21 |
| 5.1.3.4   | L-ribulose-5-phosphate 4-epimerase                                 | 20 |
| 6.3.2.1   | Pantoate-beta-alanine ligase                                       | 20 |
| 2.7.9.2   | pyruvate, water dikinase                                           | 20 |
| 2.7.1.71  | shikimate kinase                                                   | 20 |
| 2.7.1.24  | dephospho-CoA kinase                                               | 20 |
| 3.2.1.24  | alpha-mannosidase                                                  | 20 |
| 5.3.1.25  | L-Fucose isomerase                                                 | 19 |
| 4.2.1.19  | imidazoleglycerol-phosphate dehydratase                            | 19 |
| 4.1.1.48  | indole-3-glycerol-phosphate synthase                               | 19 |
| 2.6.99.2  | pyridoxine 5'-phosphate synthase                                   | 19 |
| 5.4.2.7   | phosphopentomutase                                                 | 18 |
| 4.1.2.19  | rhamnulose-1-phosphate aldolase                                    | 18 |
| 1.1.1.42  | isocitrate dehydrogenase (NADP+)                                   | 18 |
| 1.1.1.86  | ketol-acid reductoisomerase                                        | 18 |
| 3.5.1.25  | N-acetylglucosamine-6-phosphate deacetylase                        | 18 |
| 1.8.98.1  | CoB-CoM heterodisulfide reductase                                  | 18 |
| 2.5.1.3   | thiamine-phosphate diphosphorylase                                 | 17 |
| 3.2.1.10  | oligo-1,6-glucosidase                                              | 17 |
| 4.2.1.126 | N-acetylmuramic acid 6-phosphate etherase                          | 17 |
| 4.1.1.82  | phosphonopyruvate decarboxylase                                    | 17 |
| 3.1.3.25  | inositol-phosphate phosphatase                                     | 17 |
| 1.1.1.169 | 2-dehydropantoate 2-reductase                                      | 17 |
| 5.4.4.2   | Isochorismate synthase                                             | 17 |
| 1.4.1.1   | alanine dehydrogenase                                              | 17 |
| 2.7.6.3   | 2-amino-4-hydroxy-6-hydroxymethyl dihydropteridine diphosphokinase | 17 |
| 1.5.1.7   | saccharopine dehydrogenase (NAD+, L-lysine-forming)                | 17 |
| 2.4.2.19  | nicotinate-nucleotide diphosphorylase (carboxylating)              | 17 |
| 1.2.1.3   | aldehyde dehydrogenase (NAD+)                                      | 17 |
| 5.4.2.10  | phosphoglucosamine mutase                                          | 17 |
| 3.1.3.2   | acid phosphatase                                                   | 17 |
| 2.7.1.35  | pyridoxal kinase                                                   | 16 |

|           |                                                                                                 |    |
|-----------|-------------------------------------------------------------------------------------------------|----|
| 2.7.4.6   | nucleoside-diphosphate kinase                                                                   | 16 |
| 2.3.3.1   | citrate (Si)-synthase                                                                           | 16 |
| 4.2.1.8   | Mannonate dehydratase                                                                           | 16 |
| 3.5.1.18  | succinyl-diaminopimelate desuccinylase                                                          | 16 |
| 1.2.1.2   | formate dehydrogenase                                                                           | 16 |
| 2.1.3.3   | ornithine carbamoyltransferase                                                                  | 16 |
| 3.6.1.13  | ADP-ribose diphosphatase                                                                        | 16 |
| 1.1.1.37  | malate dehydrogenase                                                                            | 16 |
| 2.4.2.18  | anthranilate phosphoribosyltransferase                                                          | 16 |
| 4.2.1.45  | CDP-glucose 4,6-dehydratase                                                                     | 15 |
| 2.7.7.19  | polynucleotide adenyltransferase                                                                | 15 |
| 2.3.1.9   | acetyl-CoA C-acetyltransferase                                                                  | 15 |
| 2.1.1.148 | thymidylate synthase (FAD)                                                                      | 15 |
| 1.1.3.15  | (S)-2-hydroxy-acid oxidase                                                                      | 15 |
| 6.4.1.2   | acetyl-CoA carboxylase                                                                          | 15 |
| 3.5.3.12  | agmatine deiminase                                                                              | 15 |
| 2.3.1.19  | phosphate butyryltransferase                                                                    | 15 |
| 4.2.3.12  | 6-pyruvoyltetrahydropterin synthase                                                             | 15 |
| 1.1.1.29  | glycerate dehydrogenase                                                                         | 15 |
| 1.18.6.1  | nitrogenase                                                                                     | 15 |
| 2.7.8.30  | undecaprenyl-phosphate 4-deoxy-4-formamido-L-arabinose transferase --> deleted. Now EC 2.4.2.53 | 14 |
| 2.3.1.29  | glycine C-acetyltransferase                                                                     | 14 |
| 3.5.1.53  | N-carbamoylputrescine amidase                                                                   | 14 |
| 3.6.3.30  | Fe <sup>3+</sup> -transporting ATPase                                                           | 14 |
| 2.5.1.9   | riboflavin synthase                                                                             | 14 |
| 3.2.1.91  | cellulose 1,4-beta-cellobiosidase (non-reducing end)                                            | 14 |
| 1.5.1.3   | dihydrofolate reductase                                                                         | 14 |
| 2.7.2.2   | carbamate kinase                                                                                | 14 |
| 2.7.7.4   | sulfate adenyltransferase                                                                       | 14 |
| 3.1.3.10  | glucose-1-phosphatase                                                                           | 14 |
| 2.1.1.14  | 5-methyltetrahydropteroyltriglutamate-homocysteine S-methyltransferase                          | 14 |
| 3.1.1.11  | pectinesterase                                                                                  | 14 |
| 1.2.7.1   | pyruvate synthase                                                                               | 14 |
| 5.3.1.17  | 5-dehydro-4-deoxy-D-glucuronate isomerase                                                       | 14 |
| 3.5.3.11  | agmatinase                                                                                      | 13 |
| 4.1.1.81  | threonine-phosphate decarboxylase                                                               | 13 |
| 2.7.7.39  | glycerol-3-phosphate cytidyltransferase                                                         | 13 |
| 2.7.4.9   | dTMP kinase                                                                                     | 13 |
| 2.1.1.195 | cobalt-precorrin-5B (C1)-methyltransferase                                                      | 13 |
| 5.3.1.5   | Xylose isomerase                                                                                | 13 |
| 6.3.5.10  | adenosylcobyric acid synthase (glutamine-hydrolysing)                                           | 13 |
| 2.7.7.18  | nicotinate-nucleotide adenyltransferase                                                         | 13 |
| 3.1.3.45  | 3-deoxy-manno-octulosonate-8-phosphatase                                                        | 13 |
| 2.7.7.63  | lipoate-protein ligase                                                                          | 12 |
| 4.1.1.32  | phosphoenolpyruvate carboxykinase (GTP)                                                         | 12 |
| 5.3.1.23  | S-methyl-5-thioribose-1-phosphate isomerase                                                     | 12 |
| 1.1.1.28  | D-lactate dehydrogenase                                                                         | 12 |
| 3.6.1.22  | NAD <sup>+</sup> diphosphatase                                                                  | 12 |
| 5.3.3.2   | isopentenyl-diphosphate DELTA-isomerase                                                         | 12 |
| 3.6.1.54  | UDP-2,3-diacetylglucosamine diphosphatase                                                       | 12 |

|           |                                                                                |    |
|-----------|--------------------------------------------------------------------------------|----|
| 1.15.1.1  | superoxide dismutase                                                           | 12 |
| 4.1.1.11  | aspartate 1-decarboxylase                                                      | 12 |
| 2.7.7.43  | N-acylneuraminate cytidyltransferase                                           | 12 |
| 2.3.3.14  | homocitrate synthase                                                           | 12 |
| 1.1.1.336 | UDP-N-acetyl-D-mannosamine dehydrogenase                                       | 11 |
| 1.2.99.2  | carbon-monoxide dehydrogenase (acceptor)                                       | 11 |
| 5.3.1.28  | D-sedoheptulose 7-phosphate isomerase                                          | 11 |
| 5.1.3.20  | ADP-glyceromanno-heptose 6-epimerase                                           | 11 |
| 4.2.1.6   | galactonate dehydratase                                                        | 11 |
| 4.2.1.113 | o-succinylbenzoate synthase                                                    | 11 |
| 3.2.1.26  | beta-fructofuranosidase                                                        | 11 |
| 3.5.4.4   | adenosine deaminase                                                            | 10 |
| 2.7.7.12  | UDP-glucose-hexose-1-phosphate uridylyltransferase                             | 10 |
| 5.3.1.24  | phosphoribosylanthranilate isomerase                                           | 10 |
| 1.3.1.12  | prephenate dehydrogenase                                                       | 10 |
| 2.7.7.33  | glucose-1-phosphate cytidyltransferase                                         | 10 |
| 2.4.2.21  | nicotinate-nucleotide-dimethylbenzimidazole phosphoribosyltransferase          | 10 |
| 1.1.1.77  | lactaldehyde reductase                                                         | 10 |
| 4.1.1.19  | Arginine decarboxylase                                                         | 10 |
| 1.6.1.2   | NAD(P) <sup>+</sup> transhydrogenase (Re/Si-specific)                          | 10 |
| 5.4.3.8   | glutamate-1-semialdehyde 2,1-aminomutase                                       | 10 |
| 2.1.3.11  | N-succinylornithine carbamoyltransferase                                       | 10 |
| 2.5.1.17  | cob(T)yrinic acid a,c-diamide adenosyltransferase                              | 10 |
| 2.4.2.28  | S-methyl-5'-thioadenosine phosphorylase                                        | 10 |
| 1.1.1.44  | phosphogluconate dehydrogenase (NADP <sup>+</sup> -dependent, decarboxylating) | 10 |
| 4.3.1.1   | aspartate ammonia-lyase                                                        | 10 |
| 2.7.7.23  | UDP-N-acetylglucosamine diphosphorylase                                        | 10 |
| 3.2.1.45  | glucosylceramidase                                                             | 10 |
| 2.7.8.26  | adenosylcobinamide-GDP ribazoletransferase                                     | 10 |
| 2.3.1.31  | homoserine O-acetyltransferase                                                 | 10 |
| 3.1.26.12 | ribonuclease E                                                                 | 10 |
| 1.1.1.41  | isocitrate dehydrogenase (NAD <sup>+</sup> )                                   | 9  |
| 2.2.1.9   | 2-succinyl-5-enolpyruvyl-6-hydroxy-3-cyclohexene-1-carboxylic-acid synthase    | 9  |
| 5.1.3.8   | N-Acylglucosamine 2-epimerase                                                  | 9  |
| 4.1.1.18  | Lysine decarboxylase                                                           | 9  |
| 2.6.1.11  | acetylornithine transaminase                                                   | 9  |
| 4.4.1.21  | S-ribosylhomocysteine lyase                                                    | 9  |
| 1.5.1.12  | 1-pyrroline-5-carboxylate dehydrogenase --> transferred to EC 1.2.1.88         | 9  |
| 5.5.1.4   | inositol-3-phosphate synthase                                                  | 9  |
| 1.1.1.157 | 3-hydroxybutyryl-CoA dehydrogenase                                             | 9  |
| 1.1.1.122 | D-threo-aldose 1-dehydrogenase                                                 | 9  |
| 3.5.1.10  | formyltetrahydrofolate deformylase                                             | 9  |
| 4.2.1.51  | prephenate dehydratase                                                         | 9  |
| 2.7.11.1  | non-specific serine/threonine protein kinase                                   | 8  |
| 4.2.3.3   | methylglyoxal synthase                                                         | 8  |
| 3.5.2.7   | imidazolonepropionase                                                          | 8  |
| 2.6.1.37  | 2-aminoethylphosphonate-pyruvate transaminase                                  | 8  |
| 4.1.99.1  | tryptophanase                                                                  | 8  |
| 1.3.99.5  | 3-oxo-5alpha-steroid 4-dehydrogenase (acceptor)                                | 8  |
| 3.5.2.2   | dihydropyrimidinase                                                            | 8  |



|           |                                                                        |   |
|-----------|------------------------------------------------------------------------|---|
| 5.1.1.13  | Aspartate racemase                                                     | 8 |
| 4.4.1.5   | lactoylglutathione lyase                                               | 8 |
| 1.2.4.4   | 3-methyl-2-oxobutanoate dehydrogenase (2-methylpropanoyl-transferring) | 8 |
| 3.2.1.37  | xylan 1,4-beta-xylosidase                                              | 8 |
| 3.4.11.1  | leucyl aminopeptidase                                                  | 8 |
| 1.7.2.2   | nitrite reductase (cytochrome; ammonia-forming)                        | 8 |
| 1.3.99.23 | all-trans-retinol 13,14-reductase                                      | 8 |
| 1.5.3.1   | sarcosine oxidase                                                      | 7 |
| 6.6.1.2   | cobaltochelataase                                                      | 7 |
| 4.1.3.39  | 4-hydroxy-2-oxovalerate aldolase                                       | 7 |
| 4.1.1.33  | Diphosphomevalonate decarboxylase                                      | 7 |
| 4.2.1.1   | carbonate dehydratase                                                  | 7 |
| 2.8.4.1   | coenzyme-B sulfoethylthiotransferase                                   | 7 |
| 2.3.1.12  | dihydrolipoyllysine-residue acetyltransferase                          | 7 |
| 1.1.1.81  | hydroxypyruvate reductase                                              | 7 |
| 1.8.99.2  | adenylyl-sulfate reductase                                             | 7 |
| 3.5.3.6   | arginine deiminase                                                     | 7 |
| 5.4.3.3   | beta-lysine 5,6-aminomutase                                            | 7 |
| 6.2.1.5   | Succinate-CoA ligase (ADP-forming)                                     | 6 |
| 1.1.1.125 | 2-deoxy-D-gluconate 3-dehydrogenase                                    | 6 |
| 1.2.4.1   | pyruvate dehydrogenase (acetyl-transferring)                           | 6 |
| 3.1.3.71  | 2-phosphosulfolactate phosphatase                                      | 6 |
| 2.7.1.15  | ribokinase                                                             | 6 |
| 6.3.1.10  | adenosylcobinamide-phosphate synthase                                  | 6 |
| 2.4.1.157 | 1,2-diacylglycerol 3-glucosyltransferase                               | 6 |
| 3.1.1.61  | protein-glutamate methylesterase                                       | 6 |
| 4.2.1.24  | porphobilinogen synthase                                               | 6 |
| 2.1.1.132 | precorrin-6B C5,15-methyltransferase (decarboxylating)                 | 6 |
| 3.2.1.18  | exo-alpha-sialidase                                                    | 6 |
| 2.5.1.16  | spermidine synthase                                                    | 6 |
| 1.1.1.140 | sorbitol-6-phosphate 2-dehydrogenase                                   | 6 |
| 1.1.1.40  | malate dehydrogenase (oxaloacetate-decarboxylating) (NADP+)            | 6 |
| 6.6.1.1   | magnesium chelatase                                                    | 6 |
| 6.2.1.26  | O-succinylbenzoate-CoA ligase                                          | 6 |
| 2.6.1.13  | ornithine aminotransferase                                             | 6 |
| 2.3.1.117 | 2,3,4,5-tetrahydropyridine-2,6-dicarboxylate N-succinyltransferase     | 6 |
| 4.3.1.12  | ornithine cyclodeaminase                                               | 6 |
| 2.2.1.2   | transaldolase                                                          | 6 |
| 1.3.8.1   | short-chain acyl-CoA dehydrogenase                                     | 6 |
| 4.1.2.17  | L-fuculose-phosphate aldolase                                          | 5 |
| 5.4.2.6   | beta-Phosphoglucomutase                                                | 5 |
| 3.2.2.4   | AMP nucleosidase                                                       | 5 |
| 1.2.99.5  | formylmethanofuran dehydrogenase                                       | 5 |
| 2.7.1.16  | ribulokinase                                                           | 5 |
| 2.1.1.10  | homocysteine S-methyltransferase                                       | 5 |
| 1.1.1.14  | L-Iditol 2-dehydrogenase                                               | 5 |
| 4.99.1.3  | sirohdrochlorin cobaltochelataase                                      | 5 |
| 4.2.1.49  | Urocanate hydratase                                                    | 5 |
| 3.1.1.1   | carboxylesterase                                                       | 5 |
| 4.1.2.25  | dihydroneopterin aldolase                                              | 5 |

|            |                                                                                     |   |
|------------|-------------------------------------------------------------------------------------|---|
| 1.6.99.5   | NADH dehydrogenase (quinone)                                                        | 5 |
| 5.4.3.2    | lysine 2,3-aminomutase                                                              | 5 |
| 3.6.1.31   | phosphoribosyl-ATP diphosphatase                                                    | 5 |
| 3.2.1.50   | alpha-N-acetylglucosaminidase                                                       | 5 |
| 5.3.1.4    | L-Arabinose isomerase                                                               | 5 |
| 2.3.1.1    | amino-acid N-acetyltransferase                                                      | 5 |
| 2.7.7.73   | sulfur carrier protein ThiS adenylyltransferase                                     | 5 |
| 2.7.1.39   | homoserine kinase                                                                   | 5 |
| 2.6.1.62   | adenosylmethionine-8-amino-7-oxononanoate transaminase                              | 5 |
| 1.1.1.60   | 2-hydroxy-3-oxopropionate reductase                                                 | 5 |
| 5.1.3.9    | N-Acylglucosamine-6-phosphate 2-epimerase                                           | 5 |
| 1.3.3.4    | protoporphyrinogen oxidase                                                          | 5 |
| 4.1.1.17   | ornithine decarboxylase                                                             | 4 |
| 1.3.1.31   | 2-enoate reductase                                                                  | 4 |
| 1.1.1.26   | glyoxylate reductase                                                                | 4 |
| 3.1.11.1   | exodeoxyribonuclease I                                                              | 4 |
| 3.2.1.39   | glucan endo-1,3-beta-D-glucosidase                                                  | 4 |
| 3.2.1.54   | cyclomaltodextrinase                                                                | 4 |
| 5.4.1.2    | Precorrin-8X methylmutase                                                           | 4 |
| 1.17.1.4   | xanthine dehydrogenase                                                              | 4 |
| 2.7.1.36   | mevalonate kinase                                                                   | 4 |
| 4.1.2.22   | fructose-6-phosphate phosphoketolase                                                | 4 |
| 4.3.1.19   | threonine ammonia-lyase                                                             | 4 |
| 3.4.11.5   | prolyl aminopeptidase                                                               | 4 |
| 2.7.1.50   | hydroxyethylthiazole kinase                                                         | 4 |
| 4.2.1.32   | L(+)-Tartrate dehydratase                                                           | 4 |
| 4.1.1.37   | Uroporphyrinogen decarboxylase                                                      | 4 |
| 2.3.3.5    | 2-methylcitrate synthase                                                            | 4 |
| 3.1.3.3    | phosphoserine phosphatase                                                           | 4 |
| 2.7.6.2    | thiamine diphosphokinase                                                            | 4 |
| 4.2.1.44   | Myo-inosose-2 dehydratase                                                           | 4 |
| 2.1.1.133  | Precorrin-4 C11-methyltransferase                                                   | 4 |
| 6.1.1.23   | aspartate-tRNAAsn ligase                                                            | 4 |
| 2.3.1.61   | dihydrolipoyllysine-residue succinyltransferase                                     | 4 |
| 3.1.1.5    | lysophospholipase                                                                   | 4 |
| 1.1.1.272  | D-2-hydroxyacid dehydrogenase (NADP+)                                               | 3 |
| 6.2.1.12   | 4-Coumarate-CoA ligase                                                              | 3 |
| 1.16.3.1   | ferroxidase                                                                         | 3 |
| 2.1.1.245  | 5-methyltetrahydrothiazinopterin:corrinoid/iron-sulfur protein Co-methyltransferase | 3 |
| 4.1.3.36   | 1,4-dihydroxy-2-naphthoyl-CoA synthase                                              | 3 |
| 3.6.1.7    | acylphosphatase                                                                     | 3 |
| 3.2.2.21   | DNA-3-methyladenine glycosylase II                                                  | 3 |
| 3.5.3.1    | arginase                                                                            | 3 |
| 3.5.4.13   | dCTP deaminase                                                                      | 3 |
| 6.3.5.7    | glutaminyl-tRNA synthase (glutamine-hydrolysing)                                    | 3 |
| 3.1.1.3    | triacylglycerol lipase                                                              | 3 |
| 3.4.21.107 | peptidase Do                                                                        | 3 |
| 2.1.1.86   | tetrahydromethanopterin S-methyltransferase                                         | 3 |
| 2.6.1.76   | diaminobutyrate-2-oxoglutarate transaminase                                         | 3 |
| 1.4.1.2    | glutamate dehydrogenase                                                             | 3 |

|           |                                                                                   |   |
|-----------|-----------------------------------------------------------------------------------|---|
| 1.2.1.59  | glyceraldehyde-3-phosphate dehydrogenase (NAD(P) <sup>+</sup> ) (phosphorylating) | 3 |
| 4.1.3.3   | N-acetylneuraminase lyase                                                         | 3 |
| 2.7.1.107 | diacylglycerol kinase (ATP dependent)                                             | 3 |
| 1.1.1.1   | alcohol dehydrogenase                                                             | 3 |
| 3.1.3.15  | histidinol-phosphatase                                                            | 3 |
| 2.1.1.80  | protein-glutamate O-methyltransferase                                             | 3 |
| 2.7.1.56  | 1-phosphofructokinase                                                             | 3 |
| 3.2.1.35  | hyaluronoglucosaminidase                                                          | 3 |
| 3.5.4.1   | cytosine deaminase                                                                | 3 |
| 1.1.1.36  | acetoacetyl-CoA reductase                                                         | 3 |
| 2.7.9.3   | selenide, water dikinase                                                          | 3 |
| 2.1.1.131 | precorrin-3B C17-methyltransferase                                                | 3 |
| 1.8.1.7   | glutathione-disulfide reductase                                                   | 3 |
| 1.2.7.7   | 3-methyl-2-oxobutanoate dehydrogenase (ferredoxin)                                | 3 |
| 4.4.1.11  | methionine gamma-lyase                                                            | 3 |
| 4.2.1.55  | 3-Hydroxybutyryl-CoA dehydratase                                                  | 3 |
| 4.1.1.12  | aspartate 4-decarboxylase                                                         | 3 |
| 3.1.6.1   | arylsulfatase                                                                     | 3 |
| 1.3.1.44  | trans-2-enoyl-CoA reductase (NAD <sup>+</sup> )                                   | 3 |
| 3.1.1.47  | 1-alkyl-2-acetylglucosphosphocholine esterase                                     | 3 |
| 4.1.1.44  | 4-carboxymuconolactone decarboxylase                                              | 3 |
| 3.5.1.44  | protein-glutamine glutaminase                                                     | 3 |
| 3.6.3.28  | phosphonate-transporting ATPase                                                   | 2 |
| 2.7.1.144 | tagatose-6-phosphate kinase                                                       | 2 |
| 2.5.1.18  | glutathione transferase                                                           | 2 |
| 1.12.98.1 | coenzyme F420 hydrogenase                                                         | 2 |
| 4.3.1.2   | methylaspartate ammonia-lyase                                                     | 2 |
| 3.5.2.10  | creatininase                                                                      | 2 |
| 2.8.3.5   | 3-oxoacid CoA-transferase                                                         | 2 |
| 2.7.1.51  | L-fuculokinase                                                                    | 2 |
| 2.7.7.65  | diguanylate cyclase                                                               | 2 |
| 1.3.1.2   | dihydropyrimidine dehydrogenase (NADP <sup>+</sup> )                              | 2 |
| 6.4.1.4   | methylcrotonoyl-CoA carboxylase                                                   | 2 |
| 3.4.25.1  | proteasome endopeptidase complex                                                  | 2 |
| 1.1.1.34  | hydroxymethylglutaryl-CoA reductase (NADPH)                                       | 2 |
| 5.4.99.1  | Methylaspartate mutase                                                            | 2 |
| 2.7.7.15  | choline-phosphate cytidyltransferase                                              | 2 |
| 3.8.1.2   | (S)-2-haloacid dehalogenase                                                       | 2 |
| 1.2.7.5   | aldehyde ferredoxin oxidoreductase                                                | 2 |
| 4.2.1.40  | glucarate dehydratase                                                             | 2 |
| 2.5.1.61  | hydroxymethylbilane synthase                                                      | 2 |
| 3.5.1.5   | urease                                                                            | 2 |
| 3.5.2.6   | beta-lactamase                                                                    | 2 |
| 5.1.3.15  | glucose-6-phosphate 1-epimerase                                                   | 2 |
| 1.1.1.103 | L-threonine 3-dehydrogenase                                                       | 2 |
| 1.7.1.7   | GMP reductase                                                                     | 2 |
| 4.1.1.41  | Methylmalonyl-CoA decarboxylase                                                   | 2 |
| 4.4.1.15  | D-cysteine desulfhydrase                                                          | 2 |
| 2.7.8.25  | triphosphoribosyl-dephospho-CoA synthase --> deleted. Now EC 2.4.2.52             | 2 |
| 2.6.1.82  | putrescine aminotransferase                                                       | 2 |

|           |                                                                                |   |
|-----------|--------------------------------------------------------------------------------|---|
| 4.1.1.15  | Glutamate decarboxylase                                                        | 2 |
| 1.8.4.8   | phosphoadenylyl-sulfate reductase (thioredoxin)                                | 2 |
| 4.2.2.3   | poly(beta-D-mannuronate) lyase                                                 | 2 |
| 2.4.1.12  | cellulose synthase (UDP-forming)                                               | 2 |
| 4.1.2.40  | tagatose-bisphosphate aldolase                                                 | 2 |
| 3.6.3.25  | sulfate-transporting ATPase                                                    | 2 |
| 1.4.7.1   | glutamate synthase (ferredoxin)                                                | 2 |
| 2.7.3.9   | phosphoenolpyruvate-protein phosphotransferase                                 | 2 |
| 2.7.8.17  | UDP-N-acetylglucosamine-lysosomal-enzyme N-acetylglucosaminephosphotransferase | 2 |
| 2.5.1.30  | heptaprenyl diphosphate synthase                                               | 1 |
| 2.3.1.101 | formylmethanofuran-tetrahydromethanopterin N-formyltransferase                 | 1 |
| 3.8.1.3   | haloacetate dehalogenase                                                       | 1 |
| 6.3.2.19  | Ubiquitin-protein ligase                                                       | 1 |
| 4.1.1.74  | Indolepyruvate decarboxylase                                                   | 1 |
| 1.9.3.1   | cytochrome-c oxidase                                                           | 1 |
| 5.1.3.10  | CDP-paratose 2-epimerase                                                       | 1 |
| 3.2.1.86  | 6-phospho-beta-glucosidase                                                     | 1 |
| 4.1.1.50  | adenosylmethionine decarboxylase                                               | 1 |
| 1.1.3.9   | galactose oxidase                                                              | 1 |
| 3.1.4.3   | phospholipase C                                                                | 1 |
| 3.6.3.40  | teichoic-acid-transporting ATPase                                              | 1 |
| 1.3.99.12 | 2-methylacyl-CoA dehydrogenase                                                 | 1 |
| 4.1.1.61  | 4-Hydroxybenzoate decarboxylase                                                | 1 |
| 3.1.4.17  | 3',5'-cyclic-nucleotide phosphodiesterase                                      | 1 |
| 1.12.99.6 | hydrogenase (acceptor)                                                         | 1 |
| 1.2.1.31  | L-aminoadipate-semialdehyde dehydrogenase                                      | 1 |
| 2.4.1.7   | sucrose phosphorylase                                                          | 1 |
| 3.5.1.2   | glutaminase                                                                    | 1 |
| 2.5.1.68  | (2Z,6E)-farnesyl diphosphate synthase                                          | 1 |
| 2.3.1.170 | 6'-deoxychalcone synthase                                                      | 1 |
| 1.1.1.17  | mannitol-1-phosphate 5-dehydrogenase                                           | 1 |
| 1.2.3.3   | pyruvate oxidase                                                               | 1 |
| 3.5.5.1   | nitrilase                                                                      | 1 |
| 3.1.3.6   | 3'-nucleotidase                                                                | 1 |
| 2.4.2.4   | thymidine phosphorylase                                                        | 1 |
| 2.5.1.26  | alkylglycerone-phosphate synthase                                              | 1 |
| 1.1.1.130 | 3-dehydro-L-gulonate 2-dehydrogenase                                           | 1 |
| 2.5.1.48  | cystathionine gamma-synthase                                                   | 1 |
| 6.1.1.13  | D-Alanine-poly(phosphoribitol) ligase                                          | 1 |
| 1.4.1.21  | aspartate dehydrogenase                                                        | 1 |
| 3.1.3.7   | 3'(2'),5'-bisphosphate nucleotidase                                            | 1 |
| 2.4.1.141 | N-acetylglucosaminyldiphosphodolichol N-acetylglucosaminyltransferase          | 1 |
| 5.2.1.8   | Peptidylprolyl isomerase                                                       | 1 |
| 1.7.99.4  | nitrate reductase                                                              | 1 |
| 1.18.1.1  | rubredoxin-NAD+ reductase                                                      | 1 |
| 1.12.7.2  | ferredoxin hydrogenase                                                         | 1 |
| 3.1.1.41  | cephalosporin-C deacetylase                                                    | 1 |
| 5.1.99.4  | alpha-Methylacyl-CoA racemase                                                  | 1 |
| 3.2.1.49  | alpha-N-acetylgalactosaminidase                                                | 1 |
| 3.4.24.11 | neprilysin                                                                     | 1 |

|            |                                                           |          |
|------------|-----------------------------------------------------------|----------|
| 1.1.1.88   | hydroxymethylglutaryl-CoA reductase                       | 1        |
| 1.13.12.16 | nitronate monooxygenase                                   | 1        |
| 2.7.12.2   | mitogen-activated protein kinase kinase                   | 1        |
| 1.2.1.70   | glutamyl-tRNA reductase                                   | 1        |
| 2.8.3.17   | cinnamoyl-CoA:phenyllactate CoA-transferase               | 1        |
| 4.1.1.35   | UDP-glucuronate decarboxylase                             | 1        |
| 3.2.2.8    | ribosylpyrimidine nucleosidase                            | 1        |
| 2.6.1.19   | 4-aminobutyrate-2-oxoglutarate transaminase               | 1        |
| 2.3.3.10   | hydroxymethylglutaryl-CoA synthase                        | 1        |
| 3.1.13.4   | poly(A)-specific ribonuclease                             | 1        |
| 1.1.1.215  | gluconate 2-dehydrogenase                                 | 1        |
| 1.1.1.67   | mannitol 2-dehydrogenase                                  | 1        |
| 3.1.1.17   | gluconolactonase                                          | 1        |
| 3.5.1.54   | allophanate hydrolase                                     | <b>1</b> |
| 1.2.1.10   | acetaldehyde dehydrogenase (acetylating)                  | 1        |
| 6.1.1.24   | glutamate-tRNA <sup>Gln</sup> ligase                      | 1        |
| 3.2.1.84   | glucan 1,3-alpha-glucosidase                              | 1        |
| 2.4.1.11   | glycogen(starch) synthase                                 | 1        |
| 2.7.1.52   | fucokinase                                                | 1        |
| 2.7.8.7    | holo-[acyl-carrier-protein] synthase                      | 1        |
| 4.4.1.1    | cystathionine gamma-lyase                                 | 1        |
| 4.1.1.39   | Ribulose-bisphosphate carboxylase                         | 1        |
| 3.4.24.16  | neurolysin                                                | 1        |
| 1.1.1.251  | galactitol-1-phosphate 5-dehydrogenase                    | 1        |
| 2.1.2.3    | phosphoribosylaminoimidazolecarboxamide formyltransferase | 1        |
| 1.1.1.30   | 3-hydroxybutyrate dehydrogenase                           | 1        |
| 4.1.1.28   | aromatic-L-amino-acid decarboxylase                       | 1        |
| 2.7.1.12   | gluconokinase                                             | 1        |
| 3.6.3.8    | Ca <sup>2+</sup> -transporting ATPase                     | 1        |
| 6.5.1.1    | DNA ligase (ATP)                                          | 1        |
| 1.1.1.53   | 3alpha(or 20beta)-hydroxysteroid dehydrogenase            | 1        |
| 3.1.1.31   | 6-phosphogluconolactonase                                 | 1        |
| 3.2.1.46   | galactosylceramidase                                      | 1        |
| 4.3.1.7    | ethanolamine ammonia-lyase                                | 1        |
| 3.5.1.4    | amidase                                                   | 1        |
| 3.6.1.11   | exopolyphosphatase                                        | 1        |
| 3.6.3.27   | phosphate-transporting ATPase                             | 1        |

Supplementary Table S4. List showing abundance and diversity of all six classes of CAZyme families in HF cross rumen metagenome

| CAZy family AA <sup>1</sup> | No of contigs | CAZy family CBM <sup>2</sup> | No of contigs | CAZy family CE <sup>3</sup> | No of contigs | CAZy family GH <sup>4</sup> | No of contigs | CAZy family GT <sup>5</sup> | No of contigs | CAZy family PL <sup>6</sup> | No of contigs |
|-----------------------------|---------------|------------------------------|---------------|-----------------------------|---------------|-----------------------------|---------------|-----------------------------|---------------|-----------------------------|---------------|
| AA6                         | 50            | CBM37                        | 1241          | CE10                        | 361           | GH3                         | 993           | GT2                         | 2795          | PL1                         | 225           |
| AA5                         | 50            | CBM50                        | 962           | CE1                         | 390           | GH2                         | 927           | GT4                         | 1207          | PL11                        | 117           |
| AA4                         | 6             | CBM6                         | 482           | CE11                        | 291           | GH43                        | 739           | GT51                        | 403           | PL9                         | 31            |
| AA10                        | 5             | CBM48                        | 383           | CE4                         | 198           | GH53                        | 591           | GT28                        | 238           | PL10                        | 29            |
| AA7                         | 3             | CBM32                        | 328           | CE9                         | 199           | GH13                        | 498           | GT41                        | 197           | PL12                        | 23            |
| AA3                         | 1             | CBM2                         | 254           | CE6                         | 164           | GH23                        | 456           | GT8                         | 193           | PL6                         | 15            |
|                             |               | CBM56                        | 181           | CE8                         | 111           | GH39                        | 422           | GT35                        | 169           | PL8                         | 10            |
|                             |               | CBM13                        | 178           | CE12                        | 71            | GH5                         | 403           | GT26                        | 160           | PL4                         | 8             |
|                             |               | CBM12                        | 147           | CE7                         | 62            | GH92                        | 330           | GT9                         | 150           | PL17                        | 6             |
|                             |               | CBM35                        | 138           | CE15                        | 55            | GH31                        | 285           | GT30                        | 139           | PL21                        | 6             |
|                             |               | CBM9                         | 86            | CE2                         | 38            | GH95                        | 272           | GT5                         | 139           | PL15                        | 4             |
|                             |               | CBM20                        | 45            | CE14                        | 31            | GH33                        | 209           | GT82                        | 81            | PL14                        | 2             |
|                             |               | CBM4                         | 82            | CE3                         | 4             | GH97                        | 208           | GT19                        | 74            | PL22                        | 2             |
|                             |               | CBM57                        | 75            |                             |               | GH51                        | 201           | GT47                        | 66            | PL3                         | 1             |
|                             |               | CBM5                         | 59            |                             |               | GH4                         | 199           | GT32                        | 52            | PL7                         | 1             |
|                             |               | CBM51                        | 54            |                             |               | GH78                        | 196           | GT3                         | 48            |                             |               |
|                             |               | CBM27                        | 44            |                             |               | GH9                         | 183           | GT66                        | 44            |                             |               |
|                             |               | CBM3                         | 33            |                             |               | GH18                        | 158           | GT11                        | 31            |                             |               |
|                             |               | CBM25                        | 26            |                             |               | GH20                        | 151           | GT49                        | 31            |                             |               |
|                             |               | CBM22                        | 24            |                             |               | GH105                       | 149           | GT83                        | 30            |                             |               |
|                             |               | CBM58                        | 20            |                             |               | GH28                        | 149           | GT1                         | 26            |                             |               |
|                             |               | CBM16                        | 19            |                             |               | GH77                        | 149           | GT55                        | 19            |                             |               |
|                             |               | CBM26                        | 19            |                             |               | GH16                        | 147           | GT87                        | 17            |                             |               |
|                             |               | CBM66                        | 16            |                             |               | GH36                        | 148           | GT10                        | 13            |                             |               |
|                             |               | CBM47                        | 15            |                             |               | GH25                        | 146           | GT14                        | 11            |                             |               |
|                             |               | CBM34                        | 7             |                             |               | GH29                        | 142           | GT25                        | 7             |                             |               |
|                             |               | CBM38                        | 7             |                             |               | GH73                        | 135           | GT34                        | 5             |                             |               |
|                             |               | CBM18                        | 5             |                             |               | GH32                        | 133           | GT39                        | 5             |                             |               |
|                             |               | CBM67                        | 5             |                             |               | GH94                        | 132           | GT81                        | 3             |                             |               |
|                             |               | CBM42                        | 3             |                             |               | GH109                       | 129           | GT76                        | 2             |                             |               |
|                             |               | CBM14                        | 2             |                             |               | GH1                         | 126           | GT90                        | 2             |                             |               |
|                             |               | CBM23                        | 2             |                             |               | GH10                        | 118           | GT20                        | 1             |                             |               |
|                             |               | CBM10                        | 1             |                             |               | GH115                       | 105           | GT29                        | 1             |                             |               |
|                             |               | CBM45                        | 1             |                             |               | GH106                       | 102           | GT48                        | 1             |                             |               |
|                             |               | CBM60                        | 1             |                             |               | GH72                        | 98            | GT56                        | 1             |                             |               |
|                             |               |                              |               |                             |               | GH127                       | 97            | GT71                        | 1             |                             |               |
|                             |               |                              |               |                             |               | GH50                        | 73            | GT80                        | 1             |                             |               |
|                             |               |                              |               |                             |               | GH30                        | 71            | GT22                        | 1             |                             |               |

|  |  |  |  |  |  |       |    |      |   |  |  |
|--|--|--|--|--|--|-------|----|------|---|--|--|
|  |  |  |  |  |  | GH57  | 71 | GT50 | 1 |  |  |
|  |  |  |  |  |  | GH26  | 67 | GT77 | 1 |  |  |
|  |  |  |  |  |  | GH8   | 66 |      |   |  |  |
|  |  |  |  |  |  | GH35  | 65 |      |   |  |  |
|  |  |  |  |  |  | GH128 | 61 |      |   |  |  |
|  |  |  |  |  |  | GH67  | 57 |      |   |  |  |
|  |  |  |  |  |  | GH130 | 56 |      |   |  |  |
|  |  |  |  |  |  | GH65  | 54 |      |   |  |  |
|  |  |  |  |  |  | GH27  | 50 |      |   |  |  |
|  |  |  |  |  |  | GH38  | 46 |      |   |  |  |
|  |  |  |  |  |  | GH99  | 46 |      |   |  |  |
|  |  |  |  |  |  | GH17  | 39 |      |   |  |  |
|  |  |  |  |  |  | GH24  | 35 |      |   |  |  |
|  |  |  |  |  |  | GH12  | 31 |      |   |  |  |
|  |  |  |  |  |  | GH98  | 30 |      |   |  |  |
|  |  |  |  |  |  | GH54  | 28 |      |   |  |  |
|  |  |  |  |  |  | GH89  | 28 |      |   |  |  |
|  |  |  |  |  |  | GH66  | 27 |      |   |  |  |
|  |  |  |  |  |  | GH120 | 26 |      |   |  |  |
|  |  |  |  |  |  | GH42  | 26 |      |   |  |  |
|  |  |  |  |  |  | GH74  | 26 |      |   |  |  |
|  |  |  |  |  |  | GH84  | 21 |      |   |  |  |
|  |  |  |  |  |  | GH125 | 19 |      |   |  |  |
|  |  |  |  |  |  | GH76  | 19 |      |   |  |  |
|  |  |  |  |  |  | GH129 | 18 |      |   |  |  |
|  |  |  |  |  |  | GH19  | 18 |      |   |  |  |
|  |  |  |  |  |  | GH11  | 17 |      |   |  |  |
|  |  |  |  |  |  | GH123 | 17 |      |   |  |  |
|  |  |  |  |  |  | GH88  | 17 |      |   |  |  |
|  |  |  |  |  |  | GH63  | 16 |      |   |  |  |
|  |  |  |  |  |  | GH87  | 16 |      |   |  |  |
|  |  |  |  |  |  | GH112 | 11 |      |   |  |  |
|  |  |  |  |  |  | GH45  | 11 |      |   |  |  |
|  |  |  |  |  |  | GH48  | 11 |      |   |  |  |
|  |  |  |  |  |  | GH113 | 10 |      |   |  |  |
|  |  |  |  |  |  | GH93  | 9  |      |   |  |  |
|  |  |  |  |  |  | GH116 | 8  |      |   |  |  |
|  |  |  |  |  |  | GH103 | 7  |      |   |  |  |
|  |  |  |  |  |  | GH6   | 6  |      |   |  |  |
|  |  |  |  |  |  | GH102 | 5  |      |   |  |  |
|  |  |  |  |  |  | GH117 | 5  |      |   |  |  |
|  |  |  |  |  |  | GH121 | 5  |      |   |  |  |
|  |  |  |  |  |  | GH44  | 5  |      |   |  |  |

|  |  |  |  |  |  |  |       |   |  |  |  |  |
|--|--|--|--|--|--|--|-------|---|--|--|--|--|
|  |  |  |  |  |  |  | GH91  | 5 |  |  |  |  |
|  |  |  |  |  |  |  | GH104 | 4 |  |  |  |  |
|  |  |  |  |  |  |  | GH59  | 4 |  |  |  |  |
|  |  |  |  |  |  |  | GH108 | 3 |  |  |  |  |
|  |  |  |  |  |  |  | GH110 | 3 |  |  |  |  |
|  |  |  |  |  |  |  | GH55  | 3 |  |  |  |  |
|  |  |  |  |  |  |  | GH70  | 3 |  |  |  |  |
|  |  |  |  |  |  |  | GH58  | 2 |  |  |  |  |
|  |  |  |  |  |  |  | GH101 | 1 |  |  |  |  |
|  |  |  |  |  |  |  | GH107 | 1 |  |  |  |  |
|  |  |  |  |  |  |  | GH124 | 1 |  |  |  |  |
|  |  |  |  |  |  |  | GH132 | 1 |  |  |  |  |
|  |  |  |  |  |  |  | GH47  | 1 |  |  |  |  |
|  |  |  |  |  |  |  | GH81  | 1 |  |  |  |  |
|  |  |  |  |  |  |  | GH85  | 1 |  |  |  |  |

<sup>1</sup>AA:auxiliary activities

<sup>2</sup>CBM:carbohydrate-binding modules

<sup>3</sup>CE:carbohydrate esterases

<sup>4</sup>GH:glycoside hydrolases

<sup>5</sup>GT:glycosyltransferases

<sup>6</sup>PL:polysaccharide lyases



Supplementary Figure S1. Krona chart illustrating distribution of the functional categories indicating the percentages of reads with predicted protein functions using SEED subsystem database

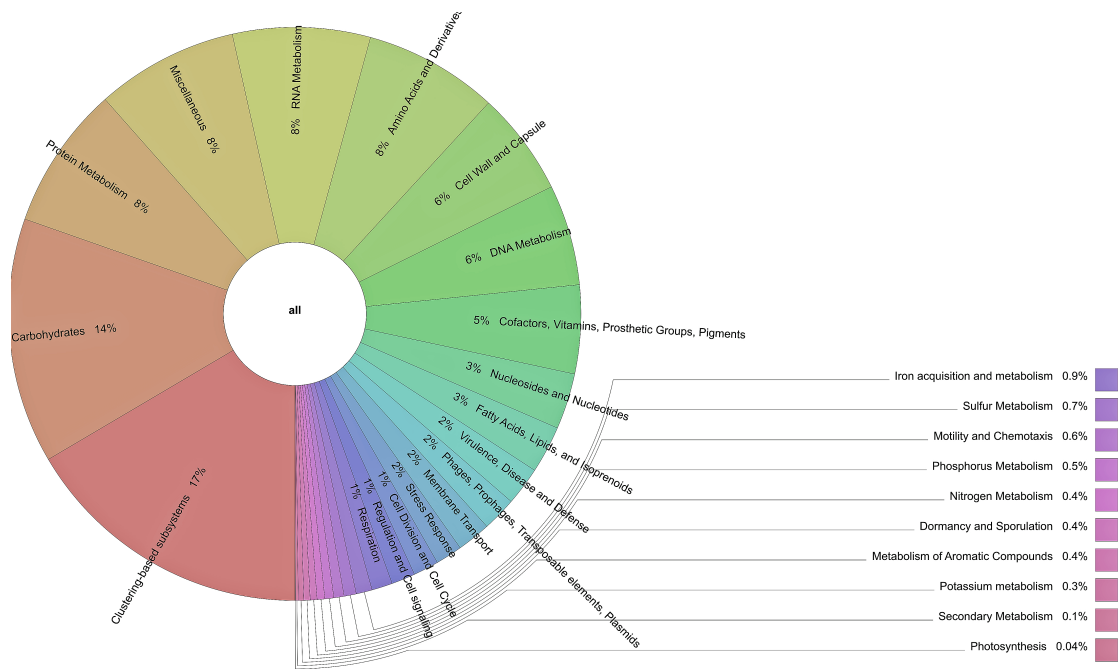

Supplementary Figure S2. KEGG map showing the metabolic pathways identified in HF cross rumen metagenome using KEGG mapper view, where blue lines highlight the pathways present in metadata

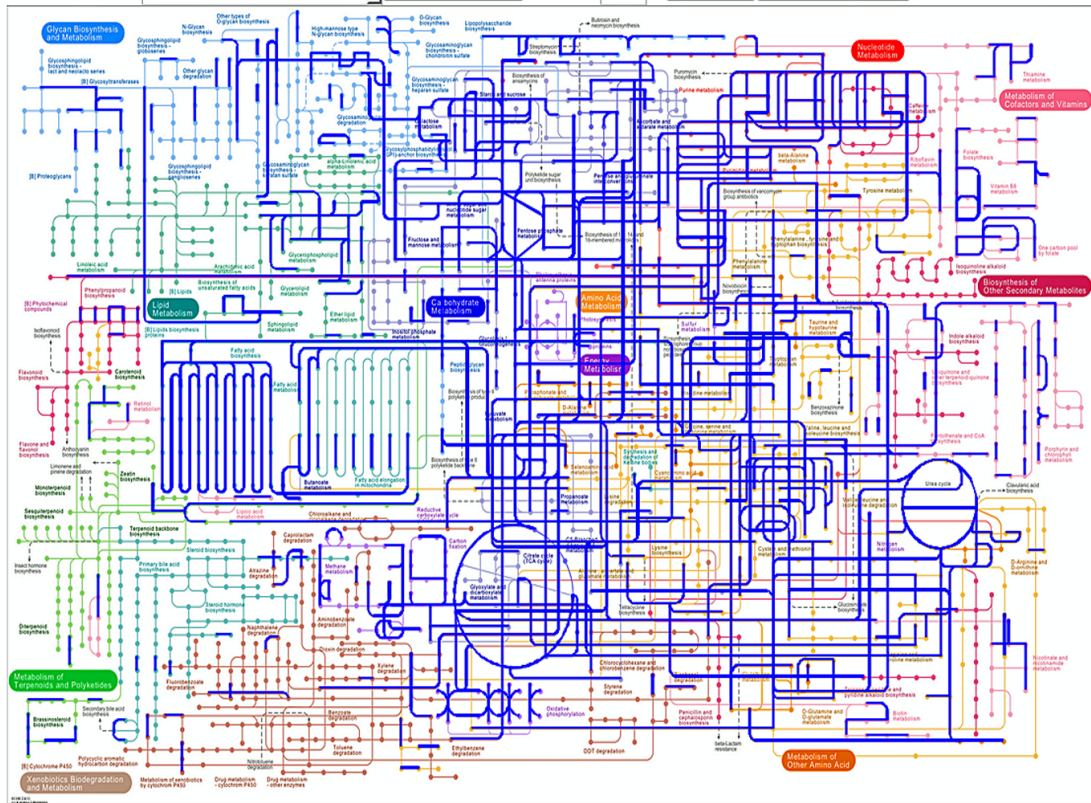

Supplement: 13568_2016_310_MOESM1_ESM.pdf [file 13568_2016_310_MOESM1_ESM.pdf]
